# Supplementary material for: TBX4 mutations (small patella syndrome) are associated with childhood-onset pulmonary arterial hypertension
Source: PubMed Central journal article supplement — J Med Genet. 2013 Apr 16;50(8):500–6. doi: 10.1136/jmedgenet-2012-101152 (PMC3717587; doi:10.1136/jmedgenet-2012-101152), 2013-04-16
Supplement: jmedgenet-2012-101152-s1.pdf [file jmedgenet-2012-101152-s1.pdf]

## Appendix 1

### **Supplementary data to manuscript “TBX4 mutations (Small Patella Syndrome) are associated with childhood-onset Pulmonary Arterial Hypertension ”**

by Kerstjens-Frederikse W.S. et al.

#### Genetic analysis

##### *aCGH analysis*

Array-comparative genomic hybridization (aCGH) analysis was performed using the 180K oligo array from Agilent (custom design ID: 23363; Agilent Technologies Inc., Santa Clara, CA, USA). A mixture of 40 healthy male or 40 female DNA samples was used as reference (sex-matched). Procedures were performed according to the manufacturer's protocol. Data were extracted using Feature Extraction V.9.1 software.

##### *Mutation analysis of TBX2 and TBX4*

Mutation analysis of all coding exons and flanking intronic sequences of the *TBX4* gene was carried out using flanking intronic primers (primer sequences are available upon request). The forward primer was designed with a PT1 tail (5'-TGTAACGACGGCCAGT-3') and the reverse primer was designed with a PT2 tail (5'-CAGGAAACAGCTATGACC-3'). PCR was performed in a total volume of 15 µl containing 10 µl AmpliTaq Gold ®Fast PCR Master Mix (Applied Biosystems), 1.5 pmol/µl of each primer (Eurogentec, Serian, Belgium) and 2 µl genomic DNA. The samples were PCR amplified on a Perkin-Elmer (ABI) Geneamp 9700 using the following PCR program: an initial denaturation at 94°C for 1 minute, followed by 5 cycles of denaturation at 94°C for 5 seconds, annealing starting at 65°C for 30 seconds with a stepdown of 1°C every cycle, and elongation at 72°C for 1 minute, followed by 20 cycles of denaturation at 94°C for 5 seconds, annealing at 60°C for 30 seconds, and elongation at 72°C for 1 minute, followed by another 15 cycles of denaturation at 94°C for 5 seconds, annealing at 55°C for 30 seconds, and elongation at 72°C for 1 minute with a final step at 72°C for 5 minutes, after which the samples were cooled down to 20°C. 5 µl of the PCR products were loaded with 5 µl loading buffer and run on a 2% agarose gel with a FastRuler Low Range DNA Ladder (Fermentas) for comparison. The remainders of all PCR products were purified with ExoSAP-IT (Amersham Pharmacia Biotech, Biscataway, NY, USA) and subjected to direct sequencing on an ABI 3730 automated sequencer, using PT1 and PT2 primers.

##### *MLPA deletion screening of TBX2 and TBX4*

For both genes, two uniquely sized probes were developed in accordance with a protocol provided by MRC Holland, The Netherlands). Ten probes were combined in one MLPA assay together with a quantity of DNA and a DNA denaturation control mix (EK-1 kit, MRC Holland). The procedure was further carried out as described by De Vries BB, Pfundt R, Leisink M et al. Diagnostic genome profiling in mental retardation. *Am J Hum Genet* 2005; 77(4):606-616.
