# Supplementary material for: TBX4 mutations (small patella syndrome) are associated with childhood-onset pulmonary arterial hypertension
Source: PubMed Central journal article supplement — J Med Genet. 2013 Apr 16;50(8):500–6. doi: 10.1136/jmedgenet-2012-101152 (PMC3717587; doi:10.1136/jmedgenet-2012-101152), 2013-04-16
Supplement: jmedgenet-2012-101152-s2.pdf [file jmedgenet-2012-101152-s2.pdf]

## Appendix 2

### Supplementary data to manuscript

**“TBX4 mutations (Small Patella Syndrome) are associated with childhood-onset Pulmonary Arterial Hypertension ”** by Kerstjens-Frederikse W.S. et al.

### Prediction of pathogenicity of missense mutations in *TBX4*

#### 1. childhood onset PAH patients

Patient 6: c.1145A>C; p.Y382S

Highly conserved nucleotide (score 1.0, [0-1]), highly conserved amino acid (considering 11 species); Grantham distance 144; Polyphen score 0,531 (possibly damaging); SIFT score 0,00 (not tolerated). Mutation is not detected in 1000 control chromosomes. Conclusion: pathogenic

#### 2. adult onset PAH patients:

Patient A1: c.229T>C, p.W77R highly conserved nucleotide (score 1.0, [0-1]); highly conserved amino acid (considering 11 species); Grantham distance 101; Polyphen score 1,00 (probably damaging); SIFT score 0,00 (not tolerated). Mutation is not detected in 1000 control chromosomes. Conclusion: probably disease causing.

Patient A2: c.104C>T, p.A35V: weakly conserved nucleotide (score 0.31, [0-1]); moderately conserved amino acid (considering 11 species); Grantham distance 64; Polyphen score 0,480 (possibly damaging); SIFT score 0,02 (not tolerated). The mutation is not detected in 1000 control chromosomes. Conclusion: unclassified variant

-SIFT algorithm (Sorting Intolerant From Tolerant) is available at <http://sift.jcvi.org>

-Polyphen-2 (Polymorphism Phenotyping program version 2 is available at <http://genetics.bwh.harvard.edu/pph/>
